# Supplementary material for: An ab initio/RRKM study of the reaction mechanism and product branching ratios of the reactions of ethynyl radical with allene and methylacetylene
Source: Royal Society of Chemistry journal article supplement (doi:10.1039/b920977h), 2010-01-01
Supplement: b920977h.pdf [file b920977h.pdf]

## Electronic Supplementary Information

**Table S1.** B3LYP and CCSD(T) calculated total energies at 0 K, zero-point energy corrections (ZPE), B3LYP/6-311G\*\* optimized Cartesian coordinates, unscaled vibrational frequencies ( $\nu_i$ ), and moments of inertia ( $I_i$ ) of all species involved in the  $C_2H + C_3H_4$  reaction.

| Species,<br>(point group)<br>electronic state                                                                                                              | Energies, a.u.                                                                                                                                                                                                                                | $i$         | $I_i$ ,<br>a.u.                    | Cartesian coordinates, angstroms     |                                                                                                  |                                                                                                   |                                                                                                 | $\nu_i$ , $cm^{-1}$                                                                                                                           |
|------------------------------------------------------------------------------------------------------------------------------------------------------------|-----------------------------------------------------------------------------------------------------------------------------------------------------------------------------------------------------------------------------------------------|-------------|------------------------------------|--------------------------------------|--------------------------------------------------------------------------------------------------|---------------------------------------------------------------------------------------------------|-------------------------------------------------------------------------------------------------|-----------------------------------------------------------------------------------------------------------------------------------------------|
|                                                                                                                                                            |                                                                                                                                                                                                                                               |             |                                    | Atom                                 | X                                                                                                | Y                                                                                                 | Z                                                                                               |                                                                                                                                               |
| <b>H (18-21)</b>                                                                                                                                           | ZPE(B3LYP/6-311G**) = 0.0<br>E(B3LYP/6-311G**) = -0.502155930011<br>E(CCSD(T)/CC-PVDZ) = -0.499278<br>E(CCSD(T)/CC-PVTZ) = -0.49980982<br>E(CCSD(T)/CC-PVQZ) = -0.499946<br>E(CCSD(T)/CC-PV5Z) = -0.499995<br>E(CCSD(T)/CBS) = -0.49999       |             |                                    |                                      |                                                                                                  |                                                                                                   |                                                                                                 |                                                                                                                                               |
| <b>C<sub>2</sub>H</b><br>(C <sub>∞v</sub> )<br>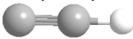                           | ZPE(B3LYP/6-311G**) = 0.014445<br>E(B3LYP+ZPE) = -76.615013<br>E(CCSD(T)/CC-PVDZ) = -76.398687<br>E(CCSD(T)/CC-PVTZ) = -76.46769892<br>E(CCSD(T)/CC-PVQZ) = -76.4876915<br>E(CCSD(T)/CC-PV5Z) = -76.4936542<br>E(CCSD(T)/CBS) = -76.49585     | A<br>B<br>C | 0.00000<br>40.54466<br>40.54466    | C<br>H<br>C                          | 0.000000<br>0.000000<br>0.000000                                                                 | 0.000000<br>0.000000<br>0.000000                                                                  | -0.473068<br>-1.536812<br>0.729203                                                              | 370, 416, 2089, 3465                                                                                                                          |
| <b>CH<sub>2</sub>CCH<sub>2</sub></b><br>Allene<br>(D <sub>2d</sub> )<br> | ZPE(B3LYP/6-311G**) = 0.054873<br>E(B3LYP+ZPE) = -116.638325<br>E(CCSD(T)/CC-PVDZ) = -116.314014<br>E(CCSD(T)/CC-PVTZ) = -116.43338571<br>E(CCSD(T)/CC-PVQZ) = -116.466524<br>E(CCSD(T)/CC-PV5Z) = -116.476317<br>E(CCSD(T)/CBS) = -116.47946 | A<br>B<br>C | 12.21789<br>203.15738<br>203.15833 | C<br>C<br>H<br>H<br>C<br>H<br>H      | 0.000002<br>1.306511<br>1.877635<br>1.877580<br>-1.306511<br>-1.877613<br>-1.877615              | 0.000014<br>0.000001<br>0.662901<br>-0.662926<br>-0.000037<br>-0.639697<br>0.639851               | 0.000058<br>-0.000019<br>0.639704<br>-0.639744<br>-0.000055<br>0.662927<br>-0.662796            | 369, 369, 896, 921, 921, 1055,<br>1108, 1466, 1508, 2041, 3114,<br>3116, 3187, 3187                                                           |
| <b>CH<sub>3</sub>CCH</b><br>Methyl Acetylene<br>(C <sub>3v</sub> )<br>  | ZPE(B3LYP/6-311G**) = 0.055468<br>E(B3LYP+ZPE) = -116.635302<br>E(CCSD(T)/CC-PVDZ) = -116.315233<br>E(CCSD(T)/CC-PVTZ) = -116.43520449<br>E(CCSD(T)/CC-PVQZ) = -116.46871<br>E(CCSD(T)/CBS) = -116.4817                                       | A<br>B<br>C | 11.25810<br>210.15954<br>210.15977 | C<br>H<br>C<br>C<br>H<br>H<br>H      | -1.420160<br>-2.482190<br>-0.219254<br>1.238135<br>1.629948<br>1.629948<br>1.629969              | -0.000001<br>-0.000004<br>0.000001<br>0.000001<br>1.011755<br>-0.386271<br>-0.625488              | 0.000001<br>0.000006<br>-0.000005<br>-0.000001<br>-0.138100<br>0.945252<br>-0.807125            | 339, 340, 666, 943, 1057,<br>1057, 1417, 1480, 1480, 2231,<br>3025, 3084, 3084, 3479                                                          |
| <b>HCCCH<sub>2</sub>CCH<sub>2</sub> (1)</b><br>(C <sub>1</sub> )<br>    | ZPE(B3LYP/6-311G**) = 0.075116<br>E(B3LYP+ZPE) = -193.341599<br>E(CCSD(T)/CC-PVTZ) = -192.99550682                                                                                                                                            | A<br>B<br>C | 88.19176<br>694.82838<br>747.59397 | C<br>C<br>C<br>H<br>C<br>C<br>H<br>H | -2.365351<br>-1.318329<br>-0.044912<br>-0.129227<br>1.114161<br>2.246218<br>2.542024<br>2.943916 | -0.508426<br>0.077818<br>0.801351<br>1.657627<br>-0.033911<br>-0.440266<br>-0.174286<br>-1.061725 | 0.041871<br>0.026158<br>0.008989<br>-0.672050<br>-0.386572<br>0.125118<br>1.144727<br>-0.429228 | 89, 196, 316, 328, 434, 577,<br>669, 686, 859, 895, 909, 976,<br>1046, 1223, 1315, 1412, 1439,<br>1741, 2231, 2945, 3020, 3033,<br>3153, 3479 |

|                                                                                       |                                    |   |           |   |           |           |           |                                |
|---------------------------------------------------------------------------------------|------------------------------------|---|-----------|---|-----------|-----------|-----------|--------------------------------|
| <b>CH<sub>2</sub>CCH<sub>2</sub>CCH (2)</b><br>(C <sub>s</sub> )                      | ZPE(B3LYP/6-311G**) = 0.075371     | A | 154.79121 | H | -3.292194 | -1.027136 | 0.053979  | 228, 292, 440, 473, 528, 672,  |
|                                                                                       | E(B3LYP+ZPE) = -193.329691         | B | 414.62452 | H | 0.144756  | 1.226129  | 1.009186  | 703, 759, 792, 797, 816, 1037, |
|                                                                                       | E(CCS(D)(CC-PVTZ)) = -192.8706069  | C | 557.26723 | C | 1.864712  | -0.790976 | 0.000436  | 1061, 1113, 1219, 1358, 1469,  |
| 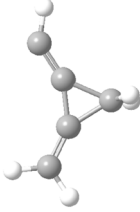   |                                    |   |           | C | 2.929174  | -0.621528 | 0.001276  | 1500, 1783, 3142, 3143, 3234,  |
|                                                                                       |                                    |   |           | C | 0.763447  | -0.117911 | -0.000791 | 3234, 3246                     |
|                                                                                       |                                    |   |           | C | -0.653852 | 0.000629  | -0.001027 |                                |
|                                                                                       |                                    |   |           | C | -1.834567 | -0.599390 | 0.000331  |                                |
|                                                                                       |                                    |   |           | H | -2.754445 | -0.025221 | 0.001721  |                                |
|                                                                                       |                                    |   |           | H | -1.912396 | -1.680414 | -0.000044 |                                |
|                                                                                       |                                    |   |           | C | 0.096972  | 1.276890  | 0.000247  |                                |
|                                                                                       |                                    |   |           | H | 0.158070  | 1.854831  | 0.919553  |                                |
|                                                                                       |                                    |   |           | H | 0.159329  | 1.856887  | -0.917688 |                                |
|                                                                                       |                                    |   |           | H |           |           |           |                                |
| <b>HCCC(CH<sub>2</sub>)<sub>2</sub> (3)</b><br>(C <sub>2v</sub> )                     | ZPE(B3LYP/6-311G**) = 0.075198     | A | 172.72704 | C | 2.172908  | 0.000045  | -0.001555 | 192, 265, 405, 526, 542, 571,  |
|                                                                                       | E(B3LYP+ZPE) = -193.382714         | B | 438.31183 | C | 0.970003  | -0.001116 | 0.002549  | 625, 657, 687, 767, 797, 800,  |
|                                                                                       | E(CCS(D)(CC-PVTZ)) = -193.03509924 | C | 611.03798 | C | -0.468552 | -0.000015 | 0.000278  | 981, 1038, 1292, 1367, 1474,   |
|    |                                    |   |           | C | -1.136488 | 1.222109  | -0.000241 | 1518, 2212, 3148, 3155, 3255,  |
|                                                                                       |                                    |   |           | H | -0.595453 | 2.158006  | 0.001079  | 3257, 3477                     |
|                                                                                       |                                    |   |           | C | -1.138116 | -1.221315 | -0.000101 |                                |
|                                                                                       |                                    |   |           | H | -0.598452 | -2.158024 | -0.000043 |                                |
|                                                                                       |                                    |   |           | H | -2.220784 | -1.250613 | -0.001827 |                                |
|                                                                                       |                                    |   |           | H | 3.235223  | -0.000981 | -0.001871 |                                |
|                                                                                       |                                    |   |           | H | -2.219064 | 1.253369  | -0.002925 |                                |
|                                                                                       |                                    |   |           | C | -2.326649 | -0.411202 | -0.129762 | 90, 190, 335, 372, 489, 666,   |
|                                                                                       |                                    |   |           | C | -1.255792 | 0.127744  | -0.053153 | 678, 682, 806, 843, 935, 968,  |
|                                                                                       |                                    |   |           | C | 0.055066  | 0.763763  | 0.052778  | 1016, 1206, 1271, 1317, 1464,  |
| <b>HCCCH<sub>2</sub>CHCH (4)</b><br>(C <sub>1</sub> )                                 | ZPE(B3LYP/6-311G**) = 0.075444     | A | 91.02892  | C | -2.326649 | -0.411202 | -0.129762 | 1668, 2222, 3014, 3064, 3107,  |
|                                                                                       | E(B3LYP+ZPE) = -193.336569         | B | 670.89859 | C | -1.255792 | 0.127744  | -0.053153 | 3236, 3477                     |
|                                                                                       | E(CCS(D)(CC-PVTZ)) = -192.99220308 | C | 704.65729 | C | 0.055066  | 0.763763  | 0.052778  |                                |
|                                                                                       |                                    |   |           | H | 0.304313  | 1.262707  | -0.887986 |                                |
|                                                                                       |                                    |   |           | C | 1.159866  | -0.229627 | 0.423064  |                                |
|                                                                                       |                                    |   |           | C | 2.245624  | -0.427191 | -0.274200 |                                |
|                                                                                       |                                    |   |           | H | 2.701276  | -0.074222 | -1.187797 |                                |
|                                                                                       |                                    |   |           | H | -3.274741 | -0.884725 | -0.202589 |                                |
|                                                                                       |                                    |   |           | H | 0.013410  | 1.543497  | 0.823386  |                                |
|                                                                                       |                                    |   |           | H | 0.987057  | -0.788181 | 1.342623  |                                |
| <b>CHCCHCHCH<sub>2</sub> (5)</b><br>(C <sub>s</sub> )                                 | ZPE(B3LYP/6-311G**) = 0.075850     | A | 130.93286 | C | 2.189719  | 2.189719  | 0.000000  | 158, 225, 383, 435, 559, 562,  |
|                                                                                       | E(B3LYP+ZPE) = -193.394519         | B | 530.92725 | H | 3.087318  | 3.087318  | 0.000000  | 651, 667, 736, 863, 943, 997,  |
|                                                                                       | E(CCS(D)(CC-PVTZ)) = -193.04363509 | C | 661.86011 | C | 1.167048  | 1.167048  | 0.000000  | 1037, 1159, 1260, 1415, 1434,  |
|  |                                    |   |           | C | 0.000000  | 0.000000  | 0.000000  | 1544, 2104, 3143, 3146, 3164,  |
|                                                                                       |                                    |   |           | H | 0.120051  | 0.120051  | 0.000000  | 3240, 3471                     |
|                                                                                       |                                    |   |           | C | -1.309155 | -1.309155 | 0.000000  |                                |
|                                                                                       |                                    |   |           | H | -2.114271 | -2.114271 | 0.000000  |                                |
|                                                                                       |                                    |   |           | C | -1.638382 | -1.638382 | 0.000000  |                                |
|                                                                                       |                                    |   |           | H | -2.673087 | -2.673087 | 0.000000  |                                |
|                                                                                       |                                    |   |           | H | -0.875400 | -0.875400 | 0.000000  |                                |
|                                                                                       |                                    |   |           | C | 2.618037  | -0.254102 | -0.000165 | 148, 154, 199, 328, 409, 526,  |
|                                                                                       |                                    |   |           | C | 1.458463  | 0.070739  | 0.000131  | 626, 684, 789, 889, 1042,      |
|                                                                                       |                                    |   |           | C | 0.104738  | 0.511669  | -0.000252 | 1046, 1059, 1284, 1397, 1451,  |
| <b>CHCCHCCH<sub>3</sub> (6)</b><br>(C <sub>s</sub> )                                  | ZPE(B3LYP/6-311G**) = 0.075191     | A | 40.27641  | C | -2.417319 | -0.161949 | 0.000401  | 1471, 1727, 2206, 2966, 3009,  |
|                                                                                       | E(B3LYP+ZPE) = -193.352873         | B | 812.27235 | C |           |           |           |                                |
|                                                                                       | E(CCS(D)(CC-PVTZ)) = -193.00374491 | C | 841.34594 | C |           |           |           |                                |

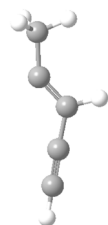

**CHCCCHCH<sub>3</sub> (7)**  
(C<sub>s</sub>)

|                                    |   |           |           |           |           |                               |
|------------------------------------|---|-----------|-----------|-----------|-----------|-------------------------------|
| ZPE(B3LYP/6-311G**) = 0.074183     | A | 47.69908  | -2.731697 | 0.893098  | 0.001892  | 3048, 3070, 3478              |
| E(B3LYP+ZPE) = -193.371149         | B | 805.87018 | -2.852785 | -0.642014 | -0.881971 |                               |
| E(CCSD(T)/CC-PVTZ) = -193.01445218 | C | 842.40451 | -2.851289 | -0.644147 | 0.882316  |                               |
|                                    |   |           | 3.635758  | -0.557674 | 0.001956  |                               |
|                                    |   |           | -0.045599 | 1.598469  | 0.000546  |                               |
|                                    |   |           | 2.669314  | -0.207850 | 0.000349  | 54, 144, 226, 292, 379, 440,  |
|                                    |   |           | 1.457646  | 0.013512  | -0.000077 | 512, 610, 721, 788, 1035,     |
|                                    |   |           | 0.154860  | 0.214972  | -0.001572 | 1048, 1087, 1324, 1399, 1482, |
|                                    |   |           | -1.112963 | 0.539260  | 0.000338  | 1487, 1810, 2010, 3016, 3046, |
|                                    |   |           | -2.269943 | -0.429323 | 0.000225  | 3063, 3120, 3469              |
|                                    |   |           | -1.925628 | -1.463697 | -0.001322 |                               |
|                                    |   |           | -2.900626 | -0.271043 | 0.881681  |                               |
|                                    |   |           | -2.902385 | -0.268972 | -0.879594 |                               |
|                                    |   |           | 3.717227  | -0.379286 | 0.001744  |                               |
|                                    |   |           | -1.382060 | 1.599571  | 0.001919  |                               |

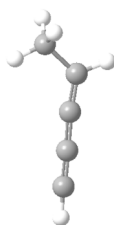

**CHCHCCCH<sub>3</sub> (8)**  
(C<sub>1</sub>)

|                                    |   |           |           |           |           |                               |
|------------------------------------|---|-----------|-----------|-----------|-----------|-------------------------------|
| ZPE(B3LYP/6-311G**) = 0.075493     | A | 51.97354  | -2.472756 | 0.159901  | -0.000048 | 29, 139, 194, 313, 388, 501,  |
| E(B3LYP+ZPE) = -193.350468         | B | 805.72700 | -2.773300 | 0.796914  | -0.837438 | 694, 718, 873, 911, 1050,     |
| E(CCSD(T)/CC-PVTZ) = -193.00216449 | C | 846.45706 | -3.016444 | -0.785306 | -0.085878 | 1054, 1178, 1268, 1416, 1478, |
|                                    |   |           | -1.033433 | -0.061081 | -0.000112 | 1478, 1623, 2330, 3020, 3075, |
|                                    |   |           | 0.160479  | -0.236549 | 0.000103  | 3081, 3087, 3237              |
|                                    |   |           | 1.568754  | -0.469596 | 0.000007  |                               |
|                                    |   |           | 1.892762  | -1.511266 | -0.000069 |                               |
|                                    |   |           | 2.476585  | 0.487705  | -0.000023 |                               |
|                                    |   |           | 2.495092  | 1.567891  | 0.000052  |                               |
|                                    |   |           | -2.795878 | 0.6494890 | 0.923768  |                               |

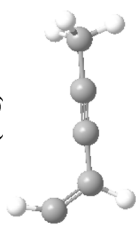

**CH<sub>2</sub>CCCCCH<sub>3</sub> (9)**  
(C<sub>1</sub>)

|                                    |   |           |           |           |           |                               |
|------------------------------------|---|-----------|-----------|-----------|-----------|-------------------------------|
| ZPE(B3LYP/6-311G**) = 0.073725     | A | 17.41919  | 2.606751  | 0.004845  | 0.000011  | 26, 56, 136, 143, 324, 358,   |
| E(B3LYP+ZPE) = -193.378718         | B | 924.78311 | 3.003110  | -0.480185 | 0.898428  | 550, 675, 871, 980, 1027,     |
| E(CCSD(T)/CC-PVTZ) = -193.01947811 | C | 930.95599 | 3.002317  | 1.027154  | -0.028634 | 1039, 1142, 1411, 1444, 1465, |
|                                    |   |           | 1.156707  | -0.009818 | -0.000198 | 1471, 1859, 2101, 3000, 3049, |
|                                    |   |           | -0.077120 | -0.002344 | -0.000034 | 3057, 3064, 3114              |
|                                    |   |           | -1.394209 | 0.002666  | -0.000018 |                               |
|                                    |   |           | -2.700866 | 0.001581  | 0.000010  |                               |
|                                    |   |           | -3.280050 | 0.925357  | 0.000074  |                               |
|                                    |   |           | 3.005384  | -0.530542 | -0.868576 |                               |
|                                    |   |           | -3.278347 | -0.923363 | 0.000080  |                               |

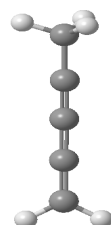

**HCCCHCCH<sub>3</sub> (10)**  
(C<sub>s</sub>)

|                                    |   |           |           |           |           |                               |
|------------------------------------|---|-----------|-----------|-----------|-----------|-------------------------------|
| ZPE(B3LYP/6-311G**) = 0.075191     | A | 40.27641  | 2.618037  | -0.254102 | -0.000165 | 148, 154, 199, 328, 409, 526, |
| E(B3LYP+ZPE) = -193.352873         | B | 812.27235 | 1.458463  | 0.070739  | 0.000131  | 626, 684, 789, 889, 1042,     |
| E(CCSD(T)/CC-PVTZ) = -193.00374491 | C | 841.34594 | 0.104738  | 0.511669  | -0.000252 | 1046, 1059, 1284, 1397, 1451, |
|                                    |   |           | -0.956317 | -0.274313 | -0.000904 | 1471, 1727, 2206, 2966, 3009, |
|                                    |   |           | -2.417319 | -0.161949 | 0.000401  | 3048, 3070, 3478              |
|                                    |   |           | -2.731697 | 0.893098  | 0.001892  |                               |
|                                    |   |           | -2.852785 | -0.642014 | -0.881971 |                               |
|                                    |   |           | -2.851289 | -0.644147 | 0.882316  |                               |
|                                    |   |           | 3.635758  | -0.557674 | 0.001956  |                               |
|                                    |   |           | -0.045599 | 1.598469  | 0.000546  |                               |

### HCCC(CH)CH<sub>3</sub> (11)

(C<sub>s</sub>)

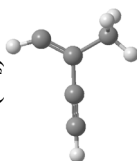

ZPE(B3LYP/6-311G\*\*) = 0.075097  
E(B3LYP+ZPE) = -193.34202  
E(CCSD(T)/CC-PVTZ) = -192.99616215

C 184.90177  
C 437.53394  
C 611.18936

0.606730  
0.337147  
0.000000  
0.972514  
2.051922  
-1.476434  
-1.718437  
-1.718437  
-2.103331  
0.848539

-2.071418  
-0.896757  
0.495810  
1.390987  
1.392526  
0.878336  
1.472235  
1.472235  
-0.013036  
-3.105709

0.000000  
0.000000  
0.000000  
0.000000  
0.000000  
0.000000  
0.883862  
-0.883862  
0.000000  
0.000000

171, 179, 271, 369, 532, 539,  
643, 678, 692, 771, 853, 1029,  
1053, 1194, 1404, 1481, 1482,  
1642, 2191, 3031, 3089, 3124,  
3242, 3476

### CH<sub>2</sub>CCCHCH<sub>2</sub> (12)

(C<sub>s</sub>)

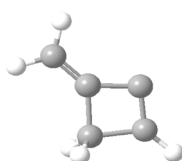

ZPE(B3LYP/6-311G\*\*) = 0.078256  
E(B3LYP+ZPE) = -193.34283  
E(CCSD(T)/CC-PVTZ) = -193.00216744

A 123.22462  
B 369.83729  
C 481.36137

0.000132  
-0.000202  
-0.000230  
-0.083550  
-0.000019  
0.901971  
0.000014  
0.000016  
-0.000035  
-0.901094  
-0.000122

-0.044439  
0.897963  
-0.083550  
0.970073  
1.588447  
-0.228937  
-1.082677  
-0.956071  
1.589700  
-0.302864

0.000132  
-0.000202  
-0.000230  
-0.083550  
-0.000019  
0.901971  
0.000014  
0.000016  
-0.000035  
-0.901094  
-0.000122

219, 350, 525, 714, 715, 771,  
837, 891, 899, 955, 981, 1086,  
1099, 1180, 1219, 1432, 1459,  
1563, 1740, 3023, 3085, 3140,  
3224, 3243

### CH<sub>2</sub>CCCHCH<sub>2</sub> (13)

(C<sub>s</sub>)

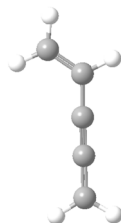

ZPE(B3LYP/6-311G\*\*) = 0.075347  
E(B3LYP+ZPE) = -193.395824  
E(CCSD(T)/CC-PVTZ) = -193.03902804

A 46.81254  
B 793.15635  
C 839.96877

-2.566363  
-2.966951  
-3.271326  
-1.236092  
-0.014198  
1.355027  
1.654973  
2.319247  
3.367615  
2.069961

0.178257  
1.185527  
-0.645291  
-0.042967  
-0.235980  
-0.487221  
-1.533577  
0.467164  
0.196571  
1.521248

-0.000250  
0.000372  
-0.000475  
0.000839  
-0.000688  
-0.000019  
0.000644  
-0.000013  
0.000483  
-0.000240

143, 178, 312, 330, 447, 536,  
645, 749, 769, 893, 978, 1031,  
1067, 1284, 1314, 1435, 1492,  
1568, 2047, 3122, 3131, 3147,  
3215, 3242

### CH<sub>2</sub>CCHCCH<sub>2</sub> (14)

(C<sub>s</sub>)

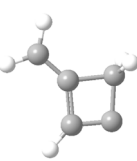

ZPE(B3LYP/6-311G\*\*) = 0.078278  
E(B3LYP+ZPE) = -193.341591  
E(CCSD(T)/CC-PVTZ) = -192.63246835

A 150.84209  
B 326.46169  
C 465.73102

1.790073  
2.373878  
0.459008  
-0.618607  
-0.653868  
-1.528814  
-0.576232  
-0.545485  
2.326826  
-0.653918

0.003270  
0.916533  
0.035917  
-1.072974  
-1.693831  
0.149237  
1.091317  
2.170652  
-0.938055  
-1.695897

0.000089  
-0.000198  
-0.000265  
0.000182  
0.897510  
-0.000484  
0.000213  
0.000532  
-0.000576  
-0.895680

209, 351, 461, 692, 711, 828,  
841, 876, 907, 999, 1059,  
1125, 1148, 1215, 1436, 1470,  
1558, 1711, 3059, 3109, 3137,  
3224, 3235

### CH<sub>2</sub>CCHCCH<sub>2</sub> (15)

(C<sub>s</sub>)

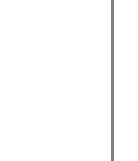

ZPE(B3LYP/6-311G\*\*) = 0.073680  
E(B3LYP+ZPE) = -193.568438  
E(CCSD(T)/CC-PVTZ) = -192.40831791

A 74.21263  
B 739.56529  
C 789.16665

-2.371748  
-2.882372  
-1.207599  
-0.000320  
1.211277  
2.370167  
2.892596

-0.437567  
-0.692966  
0.135452  
0.755923  
0.143743  
-0.439846  
-0.704762

0.002227  
0.931639  
-0.008520  
0.000286  
0.007565  
-0.002098  
0.917902

122, 134, 154, 351, 435, 497,  
611, 868, 893, 895, 945, 975,  
979, 1042, 1330, 1437, 1453,  
1874, 1929, 3053, 3057, 3088,  
3109, 3110



|                                               |                                                                                                                                                                                                                                                             |                                                            |                                                            |                                                                                                                                        |                                                                                                                                                 |
|-----------------------------------------------|-------------------------------------------------------------------------------------------------------------------------------------------------------------------------------------------------------------------------------------------------------------|------------------------------------------------------------|------------------------------------------------------------|----------------------------------------------------------------------------------------------------------------------------------------|-------------------------------------------------------------------------------------------------------------------------------------------------|
| <br><b>CH3CCH3 (21)</b><br>(C <sub>3v</sub> ) | E(CCSO(T)/CC-PVQZ) = -192.982539<br>E(CCSO(T)/CBS) = -193.00419                                                                                                                                                                                             | 3.138402<br>-0.000017<br>0.000518<br>-3.138138<br>0.000067 | -1.141487<br>0.869907<br>1.529935<br>-1.141860<br>1.529532 | 0.000724<br>0.000038<br>-0.875961<br>-0.000367<br>0.876324                                                                             | 3013, 3037, 3477, 3478,                                                                                                                         |
| <br><b>CH3CCH3 (21)</b><br>(C <sub>3v</sub> ) | ZPE(B3LYP/6-311G**) = 0.065682<br>E(B3LYP+ZPE) = -192.800155<br>E(CCSO(T)/CC-PVDZ) = -192.755153<br>E(CCSO(T)/CC-PVTZ) = -192.4454355<br>E(CCSO(T)/CC-PVQZ) = -192.998799<br>E(CCSO(T)/CBS) = -193.0198                                                     | A<br>B<br>C                                                | 11.27539<br>882.41245<br>882.41455                         | -0.001382<br>-0.817579<br>0.003766<br>-0.000120<br>0.000239<br>0.001426<br>-0.129842<br>1.018489<br>-0.000386<br>0.001796<br>-0.392110 | 148, 148, 335, 335, 539, 540,<br>643, 644, 680, 1047, 1048,<br>1182, 1413, 1473, 1474, 2167,<br>2351, 3022, 3081, 3083, 3479                    |
| <br><b>CH3 (22)</b><br>(D <sub>3h</sub> )     | ZPE(B3LYP/6-311G**) = 0.029569<br>E(B3LYP+ZPE) = -39.853757<br>E(CCSO(T)/CC-PVDZ) = -39.715785<br>E(CCSO(T)/CC-PVTZ) = -39.760817<br>E(CCSO(T)/CC-PVQZ) = -39.772271<br>E(CCSO(T)/CC-PV5Z) = -39.775614<br>E(CCSO(T)/CBS) = -39.77618                       | A<br>B<br>C                                                | 6.30449<br>6.30449<br>12.60896                             | 0.000000<br>0.000000<br>1.080657<br>-0.540328<br>-0.540328                                                                             | 501, 1402, 1402, 3108, 3288,<br>3288                                                                                                            |
| <br><b>HC4H (22)</b><br>(C <sub>∞v</sub> )    | ZPE(B3LYP/6-311G**) = 0.037493<br>E(B3LYP+ZPE) = -153.528449693<br>E(CCSO(T)/CC-PVDZ) = -153.047959522<br>E(CCSO(T)/CC-PVTZ) = -153.195968803<br>E(CCSO(T)/CC-PVQZ) = -153.2379899667<br>E(CCSO(T)/CC-PV5Z) = -153.250397472<br>E(CCSO(T)/CBS) = -153.25465 | A<br>B<br>C                                                | 0.000000<br>408.53335<br>408.53335                         | 0.000000<br>0.000000<br>0.000000<br>0.000000<br>0.000000<br>0.000000<br>-1.889186<br>-2.951597                                         | 235, 236, 527, 527, 663, 663,<br>663, 663, 917, 2111, 2285,<br>3475, 3477                                                                       |
| <br><b>C2H2 (23)</b><br>(D <sub>∞h</sub> )    | ZPE(B3LYP/6-311G**) = 0.026978<br>E(B3LYP+ZPE) = -77.354698<br>E(CCSO(T)/CC-PVDZ) = -77.108671<br>E(CCSO(T)/CC-PVTZ) = -77.187388<br>E(CCSO(T)/CC-PVQZ) = -77.20918<br>E(CCSO(T)/CC-PV5Z) = -77.215664<br>E(CCSO(T)/CBS) = -77.21752                        | A<br>B<br>C                                                | 0.000000<br>50.62104<br>50.62104                           | 0.000000<br>0.000000<br>0.000000<br>0.000000<br>0.000000<br>0.000000<br>0.599026<br>1.661350<br>-0.599026<br>-1.661350                 | 642, 642, 773, 773, 2071,<br>3420, 3523                                                                                                         |
| <br><b>C3H3 (23)</b><br>(C <sub>2v</sub> )    | ZPE(B3LYP/6-311G**) = 0.040938<br>E(B3LYP+ZPE) = -116.037356<br>E(CCSO(T)/CC-PVDZ) = -115.662911<br>E(CCSO(T)/CC-PVTZ) = -115.777715<br>E(CCSO(T)/CC-PVQZ) = -115.810061<br>E(CCSO(T)/CC-PV5Z) = -115.819593<br>E(CCSO(T)/CBS) = -115.82275                 | A<br>B<br>C                                                | 6.22440<br>188.46833<br>194.69273                          | -0.000031<br>0.929996<br>-0.929830<br>-0.000114<br>-0.000084<br>-0.000056<br>-0.000042<br>0.000445                                     | 352, 403, 468, 638, 681, 1031,<br>1089, 1455, 2013, 3140, 3230,<br>3469                                                                         |
| <br><b>TS 1</b><br>(C <sub>1</sub> )          | ZPE(B3LYP/6-311G**) = 0.075117<br>E(B3LYP+ZPE) = -193.341599<br>E(CCSO(T)/CC-PVTZ) = -192.99550331                                                                                                                                                          | A<br>B<br>C                                                | 88.25421<br>694.68250<br>747.44558                         | -0.508112<br>-1.030182<br>0.077640<br>-0.032652<br>-0.440886<br>-0.179149<br>-1.059414<br>-0.430676<br>0.801484<br>1.225108            | 683i, 135, 190, 317, 355, 489,<br>509, 689, 853, 907, 938, 957,<br>1025, 1118, 1193, 1428, 1444,<br>1765, 1965, 3014, 3043, 3070,<br>3149, 3410 |

|                                       |                                                                                       |                                       |   |           |   |           |           |           |                                                                                                                                                  |
|---------------------------------------|---------------------------------------------------------------------------------------|---------------------------------------|---|-----------|---|-----------|-----------|-----------|--------------------------------------------------------------------------------------------------------------------------------------------------|
| <b>TS 2</b><br><b>(C<sub>s</sub>)</b> | 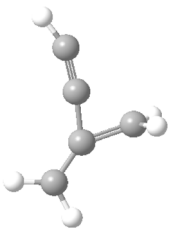   | ZPE(B3LYP/6-311G**) = 0.072708        | A | 161.50255 | H | 0.129493  | 1.658787  | -0.670313 | 633i, 208, 245, 312, 390, 419,<br>611, 678, 768, 796, 850, 916,<br>950, 1021, 1168, 1417, 1451,<br>1704, 1904, 3123, 3141, 3228,<br>3233, 3385   |
|                                       |                                                                                       | E(B3LYP+ZPE) = -193.323918            |   |           |   |           |           |           |                                                                                                                                                  |
|                                       |                                                                                       | E(CCS(D)(T)(CC-PVTZ)) = -192.9694158  |   |           |   |           |           |           |                                                                                                                                                  |
|                                       |                                                                                       |                                       |   |           |   |           |           |           |                                                                                                                                                  |
| <b>TS 3</b><br><b>(C<sub>1</sub>)</b> |    | ZPE(B3LYP/6-311G**) = 0.068827        | A | 87.54154  | C | -2.358826 | -0.498711 | 0.059510  | 1612i, 127, 144, 287, 374,<br>443, 518, 589, 680, 725, 768,<br>869, 1003, 1013, 1267, 1430,<br>1466, 1759, 1939, 2034, 3058,<br>3143, 3149, 3231 |
|                                       |                                                                                       | E(B3LYP+ZPE) = -193.265084            |   |           |   |           |           |           |                                                                                                                                                  |
|                                       |                                                                                       | E(CCS(D)(T)(CC-PVTZ)) = -192.91262339 |   |           |   |           |           |           |                                                                                                                                                  |
|                                       |                                                                                       |                                       |   |           |   |           |           |           |                                                                                                                                                  |
| <b>TS 4</b><br><b>(C<sub>1</sub>)</b> |    | ZPE(B3LYP/6-311G**) = 0.070135        | A | 57.91029  | C | 2.494666  | -0.361986 | -0.077479 | 1936i, 130, 211, 313, 374,<br>504, 588, 658, 697, 822, 871,<br>914, 1015, 1086, 1127, 1283,<br>1434, 1686, 2108, 2182, 3058,<br>3071, 3177, 3476 |
|                                       |                                                                                       | E(B3LYP+ZPE) = -193.284176            |   |           |   |           |           |           |                                                                                                                                                  |
|                                       |                                                                                       | E(CCS(D)(T)(CC-PVTZ)) = -192.92729569 |   |           |   |           |           |           |                                                                                                                                                  |
|                                       |                                                                                       |                                       |   |           |   |           |           |           |                                                                                                                                                  |
| <b>TS 5</b><br><b>(C<sub>1</sub>)</b> |  | ZPE(B3LYP/6-311G**) = 0.067262        | A | 81.86631  | C | -2.359856 | -0.529603 | -0.108710 | 1683i, 126, 179, 326, 359,<br>425, 559, 614, 645, 753, 896,<br>902, 954, 993, 1100, 1206,<br>1340, 1449, 1908, 2044, 3054,<br>3127, 3133, 3433   |
|                                       |                                                                                       | E(B3LYP+ZPE) = -193.274281            |   |           |   |           |           |           |                                                                                                                                                  |
|                                       |                                                                                       | E(CCS(D)(T)(CC-PVTZ)) = -192.90903759 |   |           |   |           |           |           |                                                                                                                                                  |
|                                       |                                                                                       |                                       |   |           |   |           |           |           |                                                                                                                                                  |
| <b>TS 6</b><br><b>(C<sub>s</sub>)</b> |  | ZPE(B3LYP/6-311G**) = 0.068305        | A | 21.09378  | C | 2.580507  | -0.044832 | -0.000010 | 2122i, 22, 137, 140, 228, 289,<br>369, 477, 583, 662, 851, 1044,<br>1045, 1141, 1413, 1471, 1475,<br>1868, 2258, 2316, 3013, 3041,<br>3066, 3074 |
|                                       |                                                                                       | E(B3LYP+ZPE) = -193.288697            |   |           |   |           |           |           |                                                                                                                                                  |
|                                       |                                                                                       | E(CCS(D)(T)(CC-PVTZ)) = -192.92781170 |   |           |   |           |           |           |                                                                                                                                                  |
|                                       |                                                                                       |                                       |   |           |   |           |           |           |                                                                                                                                                  |





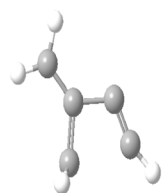

E(CSD(T)/CC-PVQZ) = -193.00753348  
E(CSD(T)/CBS) = -193.00753348

C -0.215373 1.258555 0.000033 1711, 1736, 3107, 3144, 3217,  
H -0.275686 1.817948 -0.928366 3232, 3371  
C -1.743812 -0.359047 -0.000116  
C -0.626783 -0.946300 0.000143  
H -0.276798 1.817178 0.928813  
H -2.808262 -0.245409 -0.000593

**TS 12**  
(C<sub>s</sub>)

ZPE(B3LYP/6-311G\*\*) = 0.069824  
E(B3LYP+ZPE) = -193.285473  
E(CSD(T)/CC-PVTZ) = -192.93245570

C -2.276147 -0.096972 0.000101 2152i, 185, 236, 461, 511,  
C -1.076117 0.014637 -0.000192 524, 569, 659, 670, 713, 849,  
C 0.335326 0.107221 -0.000243 954, 984, 1047, 1102, 1210,  
C 1.174858 1.141623 -0.000036 1420, 1639, 1857, 2202, 3069,  
H 1.100997 2.226368 0.000792 3145, 3169, 3476  
C 1.355967 -1.005919 0.000121  
H 1.488614 -1.571173 0.921463  
H 1.489602 -1.570591 -0.921451  
H -3.334811 -0.185708 0.000285  
H 2.172274 0.137568 0.000397

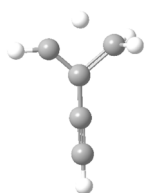

**TS 13**  
(C<sub>1</sub>)

ZPE(B3LYP/6-311G\*\*) = 0.07173  
E(B3LYP+ZPE) = -193.246693  
E(CSD(T)/CC-PVTZ) = -192.896689

C -1.860758 -0.068880 0.012333 941i, 179, 350, 430, 467, 715,  
H -2.378542 -1.020663 -0.011915 724, 841, 854, 876, 941, 947,  
C -0.539836 -0.015132 -0.027518 1101, 1143, 1156, 1401, 1423,  
C 0.575462 1.005104 0.015570 1438, 1735, 2208, 3063, 3134,  
H 0.662368 1.610343 0.917829 3137, 3224  
C 1.635647 -0.210197 -0.072790  
C 0.561082 -1.051622 -0.100959  
H 1.254861 -0.996569 0.946444  
H -2.461058 0.833034 0.067295  
H 0.692782 1.618214 -0.879470

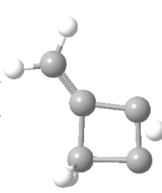

**TS 14**  
(C<sub>1</sub>)

ZPE(B3LYP/6-311G\*\*) = 0.074465  
E(B3LYP+ZPE) = -193.301102  
E(CSD(T)/CC-PVDZ) = -192.76351055  
E(CSD(T)/CC-PVTZ) = -192.95052295  
E(CSD(T)/CC-PVQZ) = -193.00443295  
E(CSD(T)/CBS) = -193.02627

C 1.998726 0.171867 -0.085620 682i, 208, 264, 515, 531, 604,  
H 2.320809 1.196109 0.052090 713, 819, 835, 851, 965, 987,  
C 0.748560 -0.191293 0.099829 1019, 1126, 1263, 1416, 1455,  
C -1.063626 0.994006 0.020964 1523, 1797, 3075, 3123, 3186,  
H -1.335456 1.729675 -0.737722 3198, 3215  
C -1.460051 -0.404611 -0.094692  
C -0.299050 -1.062667 0.136555  
H 2.74657 -0.557174 -0.390455  
H -0.854602 1.388310 1.007905  
H -2.422761 -0.800734 -0.394028

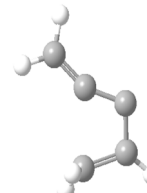

**TS 15**  
(C<sub>1</sub>)

ZPE(B3LYP/6-311G\*\*) = 0.074698  
E(B3LYP+ZPE) = -193.298423  
E(CSD(T)/CC-PVTZ) = -192.94847058

C 1.878758 -0.329586 -0.075733 638i, 219, 283, 406, 579, 656,  
H 2.627868 0.307357 -0.544214 702, 815, 870, 918, 961, 1011,  
C 0.664089 0.129587 0.142020 1038, 1134, 1270, 1422, 1478,  
C -1.179516 -0.983960 0.035942 1511, 1758, 3094, 3094, 3175,  
H -1.087354 -1.301227 1.070703 3195, 3200  
C -1.393827 0.366367 -0.232371  
C -0.311540 1.134753 0.076281  
H -0.214096 2.195820 0.266797  
H 2.179510 -1.333730 0.195287  
H -1.453713 -1.771187 -0.665405

**TS 16**  
**(C<sub>1</sub>)**

ZPE(B3LYP/6-311G\*\*) = 0.071515  
E(B3LYP+ZPE) = -193.259869  
E(CCSD(T)/CC-PVTZ) = -192.9106839

A 130.36624  
B 358.14053  
C 481.03667

C 1.860319  
H 2.476132  
C 0.527203  
C -0.627028  
H -1.408461  
C -1.637400  
C -0.498831  
H -0.468989  
H 2.366149  
H -0.710411

0.020885  
0.037863  
-0.031417  
-0.055842  
0.949009  
-0.062226  
-0.009860  
0.027460  
0.045727  
-0.229300

-0.066162  
0.826078  
0.017086  
-0.954280  
-0.758413  
0.088934  
1.054934  
2.137110  
-1.024264  
-2.023578

-0.576070  
-0.300226  
-0.013847  
0.021556  
-0.032601  
-0.789094  
0.662657  
1.049823  
1.156714

0.052075  
0.434838  
0.036033  
-0.178784  
-0.001360  
0.071153  
-0.488090  
-0.315014  
-0.182406

2093i, 199, 341, 453, 654,  
708, 719, 806, 861, 912, 920,  
946, 1073, 1160, 1202, 1263,  
1293, 1438, 1681, 2039, 3139,  
3161, 3195, 3227

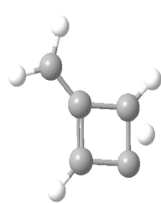

**TS 17**  
**(C<sub>1</sub>)**

ZPE(B3LYP/6-311G\*\*) = 0.068384  
E(B3LYP+ZPE) = -193.28886  
E(CCSD(T)/CC-PVTZ) = -192.91833706

A 23.25507  
B 862.07388  
C 874.49871

C 2.581159  
H 3.362945  
C 1.315894  
C 0.032321  
C -1.254093  
C -2.585847  
H -3.123527  
H -3.152109  
H 2.905970  
H -0.529877

1612i, 127, 144, 287, 374,  
443, 518, 589, 680, 725, 768,  
869, 1003, 1013, 1267, 1430,  
1466, 1759, 1939, 2034, 3058,  
3143, 3149, 3231

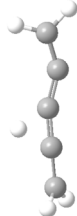

**TS 18**  
**(C<sub>1</sub>)**

ZPE(B3LYP/6-311G\*\*) = 0.068079  
E(B3LYP+ZPE) = -193.280253  
E(CCSD(T)/CC-PVTZ) = -192.918796

A 91.33058  
B 686.67776  
C 750.65042

C 2.279424  
H 2.743234  
C 1.268156  
C -0.004758  
C -1.154719  
C -2.285842  
H -2.772683  
H -2.790106  
H 2.211326  
H -0.005341

2093i, 91, 183, 277, 281, 314,  
504, 606, 647, 823, 861, 879,  
914, 1003, 1099, 1328, 1458,  
1886, 1994, 2319, 3038, 3094,  
3124, 3161

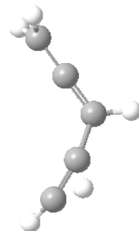

**TS 19**  
**(C<sub>1</sub>)**

ZPE(B3LYP/6-311G\*\*) = 0.073879  
E(B3LYP+ZPE) = -193.314200  
E(CCSD(T)/CC-PVTZ) = -192.96311109

A 141.53011  
B 418.37554  
C 543.13004

C -1.973096  
H -2.621665  
C -0.742695  
C 0.312195  
C 1.466643  
C 1.069182  
H -2.368345  
H 2.415410  
H 1.485836  
H 0.295388

674i, 241, 270, 448, 583, 640,  
719, 766, 839, 856, 899, 989,  
1024, 1043, 1218, 1332, 1439,  
1515, 1828, 3109, 3130, 3158,  
3190, 3194

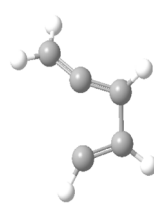

**TS 20**  
**(C<sub>s</sub>)**

ZPE(B3LYP/6-311G\*\*) = 0.072673  
E(B3LYP+ZPE) = -193.311422  
E(CCSD(T)/CC-PVTZ) = -192.95670401

A 123.82773  
B 530.00290  
C 642.68166

C -2.137536  
H -2.701422  
C -1.099533  
C 0.663410  
C -0.128419  
H -0.129143  
C 1.998852  
H 2.129339

667i, 128, 185, 228, 388, 426,  
513, 517, 781, 870, 946, 1036,  
1042, 1167, 1396, 1462, 1469,  
1791, 1886, 2991, 3061, 3076,  
3136, 3404

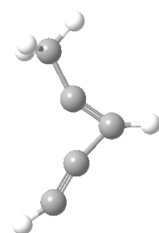

**TS 21**  
( $C_s$ )

|                                     |   |           |           |           |           |                                |
|-------------------------------------|---|-----------|-----------|-----------|-----------|--------------------------------|
| ZPE(B3LYP/6-311G**) = 0.072473      | A | 159.25289 | -2.022918 | -0.618418 | -0.000092 | 710i, 138, 227, 249, 419, 460, |
| E(B3LYP+ZPE) = -193.310158          | B | 441.32817 | -3.087719 | -0.653871 | 0.001331  | 507, 550, 646, 728, 777, 979,  |
| E(CCS(D)(T)(CC-PVTZ)) = -192.957026 | C | 589.39571 | -0.881320 | -0.116934 | -0.000233 | 1044, 1191, 1401, 1475, 1482,  |
|                                     |   |           | 0.518590  | 0.158859  | -0.000270 | 1734, 1912, 3032, 3090, 3119,  |
|                                     |   |           | 0.059243  | 1.380793  | 0.000043  | 3235, 3416                     |
|                                     |   |           | 0.251556  | 2.443051  | 0.000470  |                                |
|                                     |   |           | 1.762271  | -0.662222 | 0.000125  |                                |
|                                     |   |           | 1.786803  | -1.308707 | 0.881780  |                                |
|                                     |   |           | 1.787148  | -1.309220 | -0.881141 |                                |
|                                     |   |           | 2.647019  | -0.023715 | 0.000120  |                                |

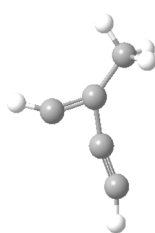

**TS 22**  
( $C_1$ )

|                                     |   |           |           |           |           |                               |
|-------------------------------------|---|-----------|-----------|-----------|-----------|-------------------------------|
| ZPE(B3LYP/6-311G**) = 0.070741      | A | 190.66106 | -1.061477 | -1.068328 | -0.003118 | 125i, 255, 360, 442, 529,     |
| E(B3LYP+ZPE) = -193.295704          | B | 306.89863 | -1.203290 | 0.265334  | -0.066167 | 622, 666, 704, 786, 852, 890, |
| E(CCS(D)(T)(CC-PVTZ)) = -192.941906 | C | 492.15912 | -0.079047 | 1.175357  | -0.006375 | 948, 1024, 1148, 1218, 1337,  |
|                                     |   |           | 1.138143  | 0.564597  | -0.059488 | 1358, 1488, 1765, 1906, 3097, |
|                                     |   |           | 1.459107  | -0.679905 | 0.067838  | 3185, 3236, 3238              |
|                                     |   |           | -1.753961 | -1.895582 | -0.060411 |                               |
|                                     |   |           | -2.199066 | 0.698042  | 0.038392  |                               |
|                                     |   |           | -0.239944 | 2.208548  | 0.275441  |                               |
|                                     |   |           | 0.510712  | -1.226841 | 0.586866  |                               |
|                                     |   |           | 2.161651  | -1.326494 | -0.436431 |                               |

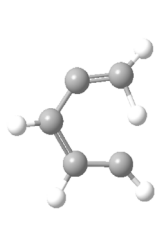

**TS A**  
( $C_s$ )

|                                       |   |           |           |           |           |                               |
|---------------------------------------|---|-----------|-----------|-----------|-----------|-------------------------------|
| ZPE(B3LYP/6-311G**) = 0.066205        | A | 28.04697  | -2.601986 | 0.061610  | -0.000065 | 349i, 17, 132, 148, 234, 337, |
| E(B3LYP+ZPE) = -193.301336            | B | 917.30124 | -2.981133 | 0.320379  | 0.993055  | 353, 527, 539, 633, 681, 697, |
| E(CCS(D)(T)(CC-PVTZ)) = -192.94211051 | C | 934.07103 | -3.041591 | -0.897620 | -0.289725 | 1046, 1047, 1185, 1414, 1472, |
|                                       |   |           | -1.151606 | -0.011249 | 0.000257  | 1473, 2138, 2334, 3021, 3080, |
|                                       |   |           | 0.057200  | -0.071356 | 0.000169  | 3081, 3473                    |
|                                       |   |           | 1.416395  | -0.142979 | 0.000031  |                               |
|                                       |   |           | 2.628666  | -0.158016 | -0.000121 |                               |
|                                       |   |           | 3.678491  | -0.319343 | -0.000230 |                               |
|                                       |   |           | -2.955068 | 0.820528  | -0.704703 |                               |
|                                       |   |           | 3.207289  | 2.007997  | -0.000018 |                               |

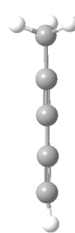

**TS B**  
( $C_s$ )

|                                       |   |           |           |           |           |                                 |
|---------------------------------------|---|-----------|-----------|-----------|-----------|---------------------------------|
| ZPE(B3LYP/6-311G**) = 0.064471        | A | 29.12588  | 2.504624  | -0.167582 | 0.000097  | 25i, 7, 15, 152, 153, 335, 335, |
| E(B3LYP+ZPE) = -193.298109            | B | 906.33884 | 3.058530  | -0.236363 | -0.931922 | 541, 541, 698, 754, 852, 852,   |
| E(CCS(D)(T)(CC-PVTZ)) = -192.74088721 | C | 922.96136 | 3.210866  | 2.000366  | -0.000145 | 1006, 1007, 1323, 1432, 1511,   |
|                                       |   |           | 1.180925  | -0.126315 | 0.000128  | 1955, 2228, 3113, 3114,         |
|                                       |   |           | -0.092692 | -0.058128 | -0.000284 | 3187, 3187                      |
|                                       |   |           | -1.376869 | 0.000420  | -0.000106 |                                 |
|                                       |   |           | -2.688260 | 0.065946  | 0.000085  |                                 |
|                                       |   |           | -3.293900 | -0.836864 | -0.000744 |                                 |
|                                       |   |           | 3.058563  | -0.238083 | 0.931975  |                                 |
|                                       |   |           | -3.200431 | 1.024902  | 0.001312  |                                 |

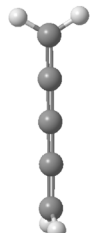

**TS C**

|                                |   |           |           |           |           |                               |
|--------------------------------|---|-----------|-----------|-----------|-----------|-------------------------------|
| ZPE(B3LYP/6-311G**) = 0.066832 | A | 101.69504 | -2.291140 | -0.539909 | -0.072525 | 650i, 96, 160, 321, 347, 407, |
| E(B3LYP+ZPE) = -193.273502     | B | 668.21254 | -1.265411 | 0.080781  | -0.034406 |                               |

|                                                                                                                                |                                                                                                                              |                                   |   |            |           |           |           |           |                                                                                                                                                 |                                                                                                                                              |
|--------------------------------------------------------------------------------------------------------------------------------|------------------------------------------------------------------------------------------------------------------------------|-----------------------------------|---|------------|-----------|-----------|-----------|-----------|-------------------------------------------------------------------------------------------------------------------------------------------------|----------------------------------------------------------------------------------------------------------------------------------------------|
| <b>(C<sub>1</sub>)</b><br>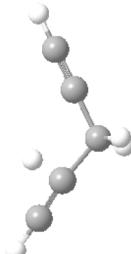                  | E(CCS(D)(CC-PVTZ)) = -192.92133116                                                                                           |                                   | C | 729.44174  | C         | -0.027965 | 0.862885  | 0.001477  | 459, 562, 656, 674, 691, 694,<br>900, 935, 997, 1242, 1340,<br>1456, 2146, 2236, 3022, 3051,<br>3466, 3478                                      |                                                                                                                                              |
|                                                                                                                                | <b>TS D</b><br><b>(C<sub>1</sub>)</b><br> | ZPE(B3LYP/6-311G**) = 0.062052    |   | A          | 181.40117 | C         | -2.541540 | 0.316583  | -0.191139                                                                                                                                       | 569i, 94, 150, 324, 363, 393,<br>429, 608, 631, 651, 689, 870,<br>897, 953, 1003, 1130, 1352,<br>1459, 1987, 2197, 3117, 3119,<br>3203, 3476 |
|                                                                                                                                |                                                                                                                              | E(B3LYP+ZPE) = -193.226775        |   | B          | 788.98902 | C         | -1.420594 | -0.076005 | 0.055095                                                                                                                                        |                                                                                                                                              |
|                                                                                                                                |                                                                                                                              | E(CCS(D)(CC-PVTZ)) = -192.9253509 |   | C          | 929.76742 | C         | -0.148054 | -0.516164 | 0.364191                                                                                                                                        |                                                                                                                                              |
|                                                                                                                                |                                                                                                                              |                                   |   |            |           | H         | -0.078715 | -1.332367 | 1.127366                                                                                                                                        |                                                                                                                                              |
| <b>TS E</b><br><b>(C<sub>s</sub>)</b><br>   | ZPE(B3LYP/6-311G**) = 0.066708                                                                                               |                                   | A | 29.31110,  | C         | 2.707186  | -0.152710 | 0.000006  | 780i, 85, 140, 162, 308, 342,<br>488, 525, 560, 653, 654, 707,<br>1033, 1050, 1175, 1409, 1466,<br>1470, 2138, 2278, 3010, 3067,<br>3082, 3478  |                                                                                                                                              |
|                                                                                                                                | E(B3LYP+ZPE) = -193.294969                                                                                                   |                                   | B | 875.44956, | C         | 1.508559  | -0.020480 | -0.000002 |                                                                                                                                                 |                                                                                                                                              |
|                                                                                                                                | E(CCS(D)(CC-PVTZ)) = -192.93576183                                                                                           |                                   | C | 893.47955  | C         | 0.143907  | 0.142060  | -0.000005 |                                                                                                                                                 |                                                                                                                                              |
|                                                                                                                                | E(CCS(D)(CC-PVDZ)) = -192.74456623                                                                                           |                                   |   |            | C         | -1.056710 | -0.090125 | -0.000025 |                                                                                                                                                 |                                                                                                                                              |
|                                                                                                                                | E(CCS(D)(CC-PVQZ)) = -192.98987297                                                                                           |                                   |   |            | C         | -2.506015 | -0.114107 | 0.000012  |                                                                                                                                                 |                                                                                                                                              |
|                                                                                                                                | E(CCS(D)(CBS)) = -193.01123                                                                                                  |                                   |   |            | H         | -2.904580 | 0.907359  | -0.000676 |                                                                                                                                                 |                                                                                                                                              |
|                                                                                                                                |                                                                                                                              |                                   |   |            | H         | -2.892500 | -0.628349 | -0.884860 |                                                                                                                                                 |                                                                                                                                              |
|                                                                                                                                |                                                                                                                              |                                   |   |            | H         | -2.892469 | -0.627150 | 0.885593  |                                                                                                                                                 |                                                                                                                                              |
|                                                                                                                                |                                                                                                                              |                                   |   |            | H         | 3.762168  | -0.275588 | 0.000019  |                                                                                                                                                 |                                                                                                                                              |
|                                                                                                                                |                                                                                                                              |                                   |   |            | H         | 0.145810  | 2.035908  | 0.000011  |                                                                                                                                                 |                                                                                                                                              |
| <b>TS F</b><br><b>(C<sub>s</sub>)</b><br> | ZPE(B3LYP/6-311G**) = 0.066086                                                                                               |                                   | A | 69.60471   | C         | -2.519677 | -0.386181 | 0.000175  | 408i, 127, 167, 242, 345, 368,<br>378, 606, 637, 671, 6912,<br>8867, 899, 943, 1009, 1129,<br>1346, 1460, 2005, 2211, 3100,<br>3116, 3190, 3478 |                                                                                                                                              |
|                                                                                                                                | E(B3LYP+ZPE) = -193.291486                                                                                                   |                                   | B | 750.73793  | C         | -1.415141 | 0.092035  | 0.000022  |                                                                                                                                                 |                                                                                                                                              |
|                                                                                                                                | E(CCS(D)(CC-PVTZ)) = -192.931495                                                                                             |                                   | C | 807.98144  | C         | -0.131529 | 0.707399  | -0.000094 |                                                                                                                                                 |                                                                                                                                              |
|                                                                                                                                | E(CCS(D)(CC-PVDZ)) = -192.74178176                                                                                           |                                   |   |            | C         | 1.005651  | 0.053069  | -0.000620 |                                                                                                                                                 |                                                                                                                                              |
|                                                                                                                                | E(CCS(D)(CC-PVQZ)) = -192.98565055                                                                                           |                                   |   |            | C         | 2.177914  | -0.527290 | 0.000068  |                                                                                                                                                 |                                                                                                                                              |
|                                                                                                                                | E(CCS(D)(CBS)) = -193.00729                                                                                                  |                                   |   |            | H         | 3.591229  | 1.072050  | 0.001521  |                                                                                                                                                 |                                                                                                                                              |
| <b>TS G</b><br><b>(C<sub>s</sub>)</b><br> | ZPE(B3LYP/6-311G**) = 0.06687                                                                                                |                                   | A | 29.24966,  | C         | 2.754632  | -0.045447 | 0.000001  | 523i, 133, 146, 162, 346, 379,<br>395, 529, 534, 642, 644, 687,<br>1040, 1055, 1178, 1412, 1471,<br>1476, 2147, 2288, 3027, 3090,<br>3092, 3477 |                                                                                                                                              |
|                                                                                                                                | E(B3LYP+ZPE) = -193.298989                                                                                                   |                                   | B | 885.48922, | C         | 1.545965  | -0.036609 | 0.000001  |                                                                                                                                                 |                                                                                                                                              |
|                                                                                                                                | E(CCS(D)(CC-PVTZ)) = -192.94027766                                                                                           |                                   | C | 903.51365  | C         | 0.185951  | -0.034684 | 0.000001  |                                                                                                                                                 |                                                                                                                                              |
|                                                                                                                                |                                                                                                                              |                                   |   |            | C         | -1.028753 | 0.046717  | -0.000013 |                                                                                                                                                 |                                                                                                                                              |
|                                                                                                                                |                                                                                                                              |                                   |   |            | C         | -2.472080 | -0.164227 | 0.000004  |                                                                                                                                                 |                                                                                                                                              |
|                                                                                                                                |                                                                                                                              |                                   |   |            | H         | -2.694569 | -1.235377 | -0.000138 |                                                                                                                                                 |                                                                                                                                              |
|                                                                                                                                |                                                                                                                              |                                   |   | H          | -2.934348 | 0.284352  | 0.883115  |           |                                                                                                                                                 |                                                                                                                                              |
|                                                                                                                                |                                                                                                                              |                                   |   | H          | -2.934408 | 0.284600  | -0.882949 |           |                                                                                                                                                 |                                                                                                                                              |
|                                                                                                                                |                                                                                                                              |                                   |   | H          | 3.816778  | -0.051748 | 0.000004  |           |                                                                                                                                                 |                                                                                                                                              |

|                                       |                                                                                       |                                       |   |           |           |           |            |           |                                 |
|---------------------------------------|---------------------------------------------------------------------------------------|---------------------------------------|---|-----------|-----------|-----------|------------|-----------|---------------------------------|
| <b>TS H</b><br><b>(C<sub>s</sub>)</b> | 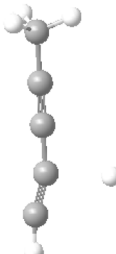   | ZPE(B3LYP/6-311G**) = 0.066571        | A | 28.21390  | H         | -1.167738 | 2.123672   | 0.000005  | 861i, 24, 150, 157, 346, 349,   |
|                                       |                                                                                       | E(B3LYP+ZPE) = -193.293577            | B | 885.61895 | H         | -2.927882 | -0.582545  | 0.884726  | 466, 531, 544, 613, 648, 705,   |
|                                       |                                                                                       | E(CCS(D)(T)(CC-PVTZ)) = -192.93412939 | C | 902.56663 | H         | -2.976533 | 0.949611   | -0.000160 | 1048, 1175, 1414, 1473, 1474,   |
|                                       |                                                                                       |                                       |   |           | C         | -1.101070 | -0.012778  | 0.000012  | 2065, 2344, 3022, 3081, 3082,   |
|                                       |                                                                                       |                                       | C | 0.106447  | 0.021234  | -0.000033 | 3461       |           |                                 |
|                                       |                                                                                       |                                       | C | 1.479919  | 0.073857  | 0.000017  |            |           |                                 |
|                                       |                                                                                       |                                       | H | 1.577770  | 1.936580  | -0.000001 |            |           |                                 |
|                                       |                                                                                       |                                       | C | 2.657543  | -0.253254 | -0.000003 |            |           |                                 |
|                                       |                                                                                       |                                       | H | 3.717097  | -0.339937 | 0.000021  |            |           |                                 |
|                                       |                                                                                       |                                       | H | -2.927866 | -0.582829 | -0.884559 |            |           |                                 |
|                                       |                                                                                       |                                       | C | 2.416310  | -0.301927 | 0.074511  |            |           |                                 |
| <b>TS I</b><br><b>(C<sub>1</sub>)</b> |    | ZPE(B3LYP/6-311G**) = 0.065230        | A | 86.56636  | H         | 2.416310  | -0.301927  | 0.074511  | 3i, 27, 81, 141, 295, 350, 359, |
|                                       |                                                                                       | E(B3LYP+ZPE) = -193.293238            | B | 747.75705 | H         | 2.963118  | -0.621138  | -0.808262 | 606, 625, 642, 693, 883, 884,   |
|                                       |                                                                                       | E(CCS(D)(T)(CC-PVTZ)) = -192.93529151 | C | 818.65408 | C         | 1.212546  | 0.177385   | -0.012424 | 951, 1004, 1139, 1352, 1465,    |
|                                       |                                                                                       |                                       |   |           | C         | 0.002031  | 0.680286   | -0.102326 | 2042, 2208, 3111, 3115, 3183,   |
|                                       |                                                                                       |                                       | C | -1.192732 | -0.091031 | -0.043565 | 3478       |           |                                 |
|                                       |                                                                                       |                                       | C | -2.226016 | -0.707585 | 0.000712  |            |           |                                 |
|                                       |                                                                                       |                                       | H | -3.137485 | -1.251438 | 0.040037  |            |           |                                 |
|                                       |                                                                                       |                                       | H | 2.915521  | -0.406414 | 1.033705  |            |           |                                 |
|                                       |                                                                                       |                                       | H | -0.109562 | 1.755877  | -0.230322 |            |           |                                 |
|                                       |                                                                                       |                                       | H | -3.904425 | 1.980347  | 0.463398  |            |           |                                 |
|                                       |                                                                                       |                                       | C | 2.573627  | -0.133868 | 0.000018  |            |           |                                 |
| <b>TS J</b><br><b>(C<sub>s</sub>)</b> |    | ZPE(B3LYP/6-311G**) = 0.065456        | A | 31.81967  | C         | 2.573627  | -0.133868  | 0.000018  | 737i, 135, 152, 186, 309, 344,  |
|                                       |                                                                                       | E(B3LYP+ZPE) = -193.291537            | B | 852.69972 | H         | 3.160625  | 0.782259   | 0.000422  | 462, 535, 556, 664, 766, 853,   |
|                                       |                                                                                       | E(CCS(D)(T)(CC-PVTZ)) = -192.92267825 | C | 872.12636 | C         | 1.266814  | -0.095824  | -0.000041 | 858, 991, 1003, 1317, 1426,     |
|                                       |                                                                                       |                                       |   |           | C         | -0.000069 | 0.151130   | 0.000031  | 1504, 1928, 2164, 3100, 3115,   |
|                                       |                                                                                       |                                       | C | -1.271834 | -0.000557 | -0.000029 | 3176, 3190 |           |                                 |
|                                       |                                                                                       |                                       | C | -2.570229 | -0.150559 | 0.000011  |            |           |                                 |
|                                       |                                                                                       |                                       | H | -3.130568 | -0.216829 | -0.927800 |            |           |                                 |
|                                       |                                                                                       |                                       | H | -3.130412 | -0.217689 | 0.927855  |            |           |                                 |
|                                       |                                                                                       |                                       | H | 3.118139  | -1.073431 | -0.000421 |            |           |                                 |
|                                       |                                                                                       |                                       | H | -0.007642 | 2.103760  | 0.000000  |            |           |                                 |
|                                       |                                                                                       |                                       | C | -2.344543 | -0.458770 | -0.044864 |            |           |                                 |
| <b>TS K</b><br><b>(C<sub>1</sub>)</b> |  | ZPE(B3LYP/6-311G**) = 0.065638        | A | 86.34344  | C         | -2.344543 | -0.458770  | -0.044864 | 296i, 60, 141, 200, 310, 360,   |
|                                       |                                                                                       | E(B3LYP+ZPE) = -193.292555            | B | 736.25040 | H         | -2.787200 | -0.950300  | 0.816951  | 365, 607, 633, 681, 686, 883,   |
|                                       |                                                                                       | E(CCS(D)(T)(CC-PVTZ)) = -192.9325076  | C | 777.28364 | C         | -1.196000 | 0.140589   | 0.035697  | 884, 954, 1001, 1138, 1352,     |
|                                       |                                                                                       |                                       |   |           | C         | -0.040997 | 0.764367   | 0.121846  | 1462, 2035, 2176, 3111, 3116,   |
|                                       |                                                                                       |                                       | C | 1.215760  | 0.147692  | -0.112849 | 3183, 3474 |           |                                 |
|                                       |                                                                                       |                                       | C | 2.307230  | -0.350101 | -0.256256 |            |           |                                 |
|                                       |                                                                                       |                                       | H | 2.821920  | -1.072399 | 1.829400  |            |           |                                 |
|                                       |                                                                                       |                                       | H | 3.249652  | -0.764582 | -0.517875 |            |           |                                 |
|                                       |                                                                                       |                                       | H | -2.899206 | -0.495409 | -0.978304 |            |           |                                 |
|                                       |                                                                                       |                                       | H | -0.033865 | 1.820021  | 0.388386  |            |           |                                 |
|                                       |                                                                                       |                                       | C | -2.620812 | -0.029126 | 0.000098  |            |           |                                 |
| <b>TS L</b><br><b>(C<sub>s</sub>)</b> |  | ZPE(B3LYP/6-311G**) = 0.065644        | A | 31.39458  | C         | -2.620812 | -0.029126  | 0.000098  | 503i, 145, 149, 171, 337, 365,  |
|                                       |                                                                                       | E(B3LYP+ZPE) = -193.295087            | B | 865.39902 | H         | -3.185422 | -0.023919  | -0.927432 | 391, 541, 541, 691, 754, 853,   |
|                                       |                                                                                       | E(CCS(D)(T)(CC-PVTZ)) = -192.92734667 | C | 884.40603 | H         | -3.185115 | -0.023604  | 0.927814  | 866, 1005, 1008, 1321, 1433,    |
|                                       |                                                                                       |                                       |   |           | C         | -1.308597 | -0.039587  | -0.000115 | 1508, 1932, 2175, 3115, 3120,   |
|                                       |                                                                                       |                                       | C | -0.038123 | -0.056460 | -0.000136 | 3190, 3205 |           |                                 |
|                                       |                                                                                       |                                       | C | 1.243327  | 0.014800  | -0.000013 |            |           |                                 |
|                                       |                                                                                       |                                       | H | 1.258263  | 2.202849  | 0.000018  |            |           |                                 |



| (C <sub>s</sub> )                                                                   | E(CSD(T)/CC-PVTZ) = -192.942732 | C | 889.73957 | C | 0.000000  | 0.861462  | 0.000000  | 486, 548, 649, 713, 765, 767,<br>793, 875, 1029, 1150, 1463,<br>1836, 1951, 3127, 3208, 3347,<br>3355, 3455 |
|-------------------------------------------------------------------------------------|---------------------------------|---|-----------|---|-----------|-----------|-----------|-------------------------------------------------------------------------------------------------------------|
| 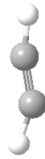 |                                 | C |           | C | 1.341320  | -0.831016 | 0.000000  |                                                                                                             |
|                                                                                     |                                 | C |           | C | 2.536442  | -0.558564 | 0.000000  |                                                                                                             |
|                                                                                     |                                 | H |           | H | -2.980031 | -0.155144 | 0.927759  |                                                                                                             |
|                                                                                     |                                 | H |           | H | -2.980031 | -0.155144 | -0.927759 |                                                                                                             |
|  |                                 | H |           | H | 0.651469  | 1.710611  | 0.000000  |                                                                                                             |
|                                                                                     |                                 | H |           | H | 0.546212  | -1.545170 | 0.000000  |                                                                                                             |
|                                                                                     |                                 | H |           | H | 3.485114  | -0.075527 | 0.000000  |                                                                                                             |

**Table S2.** RRKM calculated rate constants for individual reaction steps of the  $C_2H + C_3H_4$  reaction on the  $C_5H_5$  potential energy surface at collision energies of 0-5.3 kcal/mol.

| Reaction Step | Transition State | Symmetry Factor | Collision Energy, kcal/mol |          |          |          |          |          |
|---------------|------------------|-----------------|----------------------------|----------|----------|----------|----------|----------|
|               |                  |                 | 0.00                       | 1.00     | 2.00     | 3.00     | 4.00     | 5.26     |
| 1 → 3         | TS 1             | 1               | 1.00E+10                   | 1.12E+10 | 1.25E+10 | 1.39E+10 | 1.53E+10 | 1.72E+10 |
| 3 → 1         | TS 1             | 2               | 2.41E+08                   | 2.85E+08 | 3.35E+08 | 3.93E+08 | 4.57E+08 | 5.51E+08 |
| 1 → 4         | TS 3             | 2               | 6.96E+05                   | 1.12E+06 | 1.76E+06 | 2.69E+06 | 4.03E+06 | 6.49E+06 |
| 4 → 1         | TS 3             | 1               | 7.71E+05                   | 1.23E+06 | 1.92E+06 | 2.92E+06 | 4.34E+06 | 6.95E+06 |
| 1 → 5         | TS 4             | 2               | 2.48E+07                   | 3.28E+07 | 4.27E+07 | 5.51E+07 | 7.03E+07 | 9.41E+07 |
| 5 → 1         | TS 4             | 1               | 5.99E+04                   | 8.44E+04 | 1.17E+05 | 1.61E+05 | 2.18E+05 | 3.15E+05 |
| 1 → 16        | TS 5             | 2               | 6.44E+04                   | 1.13E+05 | 1.90E+05 | 3.10E+05 | 4.90E+05 | 8.42E+05 |
| 16 → 1        | TS 5             | 1               | 2.95E+04                   | 5.17E+04 | 8.72E+04 | 1.42E+05 | 2.26E+05 | 3.88E+05 |
| 1 → 18        | TS M             | 2               | 2.58E+08                   | 3.37E+08 | 4.34E+08 | 5.54E+08 | 6.99E+08 | 9.24E+08 |
| 1 → 20        | TS N             | 2               | 6.69E+08                   | 9.11E+08 | 1.22E+09 | 1.62E+09 | 2.11E+09 | 2.91E+09 |
| 2 → 3         | TS 2             | 2               | 8.93E+05                   | 1.18E+06 | 1.55E+06 | 2.00E+06 | 2.57E+06 | 3.48E+06 |
| 3 → 2         | TS 2             | 3               | 1.46E+08                   | 1.82E+08 | 2.26E+08 | 2.78E+08 | 3.39E+08 | 4.31E+08 |
| 3 → 11        | TS 12            | 2               | 1.36E+08                   | 1.63E+08 | 1.92E+08 | 2.26E+08 | 2.64E+08 | 3.20E+08 |
| 11 → 3        | TS 12            | 1               | 1.11E+11                   | 1.26E+11 | 1.43E+11 | 1.61E+11 | 1.80E+11 | 2.07E+11 |
| 3 → 12        | TS 11            | 1               | 3.35E+07                   | 4.79E+07 | 6.72E+07 | 9.25E+07 | 1.25E+08 | 1.80E+08 |
| 12 → 3        | TS 11            | 1               | 1.34E+03                   | 2.13E+03 | 3.32E+03 | 5.05E+03 | 7.55E+03 | 1.22E+04 |
| 4 → 20        | TS C             | 3               | 2.02E+05                   | 3.06E+05 | 4.53E+05 | 6.58E+05 | 9.37E+05 | 1.43E+06 |
| 5 → 6         | TS 8             | 1               | 5.12E+05                   | 6.46E+05 | 8.09E+05 | 1.00E+06 | 1.24E+06 | 1.60E+06 |
| 6 → 5         | TS 8             | 2               | 1.95E+08                   | 2.30E+08 | 2.71E+08 | 3.17E+08 | 3.68E+08 | 4.42E+08 |
| 5 → 18        | TS D             | 1               | 2.16E+06                   | 2.96E+06 | 4.02E+06 | 5.40E+06 | 7.16E+06 | 1.01E+07 |
| 6 → 7         | TS 10            | 1               | 2.46E+07                   | 3.30E+07 | 4.37E+07 | 5.72E+07 | 7.39E+07 | 1.01E+08 |
| 7 → 6         | TS 10            | 1               | 9.11E+05                   | 1.24E+06 | 1.67E+06 | 2.22E+06 | 2.91E+06 | 4.04E+06 |
| 6 → 8         | TS 9             | 1               | 4.16E+08                   | 5.51E+08 | 7.21E+08 | 9.32E+08 | 1.19E+09 | 1.61E+09 |
| 8 → 6         | TS 9             | 1               | 1.15E+08                   | 1.52E+08 | 1.98E+08 | 2.56E+08 | 3.27E+08 | 4.38E+08 |
| 6 → 10        | TS 20            | 1               | 5.24E+09                   | 5.92E+09 | 6.68E+09 | 7.46E+09 | 8.34E+09 | 9.53E+09 |
| 10 → 6        | TS 20            | 1               | 2.83E+12                   | 2.97E+12 | 3.10E+12 | 3.23E+12 | 3.37E+12 | 3.54E+12 |
| 6 → 18        | TS F             | 3               | 7.95E+08                   | 1.02E+09 | 1.28E+09 | 1.61E+09 | 2.00E+09 | 2.59E+09 |
| 6 → 21        | TS E             | 1               | 1.80E+09                   | 2.23E+09 | 2.75E+09 | 3.36E+09 | 4.07E+09 | 5.13E+09 |
| 7 → 21        | TS G             | 1               | 9.97E+07                   | 1.23E+08 | 1.51E+08 | 1.84E+08 | 2.23E+08 | 2.81E+08 |
| 7 → 22        | TS P             | 1               | 2.07E+09                   | 2.49E+09 | 2.97E+09 | 3.53E+09 | 4.17E+09 | 5.09E+09 |
| 8 → 9         | TS 6             | 1               | 1.16E+08                   | 1.53E+08 | 2.00E+08 | 2.58E+08 | 3.29E+08 | 4.41E+08 |
| 9 → 8         | TS 6             | 2               | 1.13E+06                   | 1.54E+06 | 2.06E+06 | 2.72E+06 | 3.56E+06 | 4.92E+06 |
| 8 → 21        | TS H             | 1               | 4.14E+09                   | 5.01E+09 | 6.03E+09 | 7.20E+09 | 8.54E+09 | 1.05E+10 |
| 9 → 13        | TS 7             | 3               | 3.73E+04                   | 5.06E+04 | 6.78E+04 | 8.96E+04 | 1.17E+05 | 1.62E+05 |
| 13 → 9        | TS 7             | 1               | 2.06E+05                   | 2.81E+05 | 3.79E+05 | 5.05E+05 | 6.65E+05 | 9.28E+05 |
| 9 → 19        | TS B             | 3               | 6.28E+07                   | 9.40E+07 | 1.25E+08 | 1.72E+08 | 2.33E+08 | 3.37E+08 |
| 9 → 21        | TS A             | 2               | 2.05E+08                   | 2.52E+08 | 3.08E+08 | 3.74E+08 | 4.51E+08 | 5.67E+08 |
| 10 → 11       | TS 21            | 1               | 2.82E+12                   | 2.95E+12 | 3.08E+12 | 3.21E+12 | 3.34E+12 | 3.50E+12 |
| 11 → 10       | TS 21            | 1               | 2.80E+10                   | 3.12E+10 | 3.46E+10 | 3.83E+10 | 4.18E+10 | 4.75E+10 |
| 11 → 22       | TS O             | 1               | 9.26E+09                   | 1.14E+10 | 1.39E+10 | 1.69E+10 | 2.01E+10 | 2.51E+10 |
| 12 → 13       | TS 14            | 1               | 9.16E+09                   | 1.04E+10 | 1.21E+10 | 1.37E+10 | 1.56E+10 | 1.82E+10 |
| 13 → 12       | TS 14            | 1               | 1.90E+06                   | 2.30E+06 | 2.76E+06 | 3.30E+06 | 3.91E+06 | 4.83E+06 |
| 12 → 14       | TS 13            | 1               | 5.63E-03                   | 4.62E-02 | 3.79E-01 | 3.04E+00 | 2.02E+01 | 8.23E+01 |
| 14 → 12       | TS 13            | 1               | 5.55E-03                   | 4.55E-02 | 3.73E-01 | 2.99E+00 | 1.98E+01 | 8.09E+01 |
| 13 → 15       | TS 17            | 1               | 9.03E+03                   | 1.40E+04 | 2.12E+04 | 3.16E+04 | 4.61E+04 | 7.25E+04 |
| 15 → 13       | TS 17            | 2               | 1.82E+05                   | 2.73E+05 | 4.00E+05 | 5.76E+05 | 8.13E+05 | 1.23E+06 |



|         |       |   |          |          |          |          |          |          |
|---------|-------|---|----------|----------|----------|----------|----------|----------|
| 13 → 19 | TS L  | 1 | 1.15E+06 | 1.62E+06 | 2.24E+06 | 3.06E+06 | 4.14E+06 | 5.94E+06 |
| 14 → 15 | TS 15 | 1 | 3.14E+09 | 3.68E+09 | 4.28E+09 | 4.95E+09 | 5.70E+09 | 6.76E+09 |
| 15 → 14 | TS 15 | 2 | 1.33E+07 | 1.59E+07 | 1.87E+07 | 2.20E+07 | 2.57E+07 | 3.10E+07 |
| 14 → 17 | TS 16 | 2 | 2.70E+04 | 4.99E+04 | 8.79E+04 | 1.49E+05 | 2.43E+05 | 4.31E+05 |
| 17 → 14 | TS 16 | 2 | 1.18E+02 | 2.30E+02 | 4.24E+02 | 7.51E+02 | 1.28E+03 | 2.40E+03 |
| 15 → 16 | TS 18 | 2 | 3.07E+05 | 4.58E+05 | 6.70E+05 | 9.62E+05 | 1.36E+06 | 2.05E+06 |
| 16 → 15 | TS 18 | 1 | 3.45E+06 | 5.02E+06 | 7.16E+06 | 1.00E+07 | 1.39E+07 | 2.04E+07 |
| 15 → 18 | TS K  | 4 | 5.35E+08 | 6.95E+08 | 8.89E+08 | 1.13E+09 | 1.40E+09 | 1.89E+09 |
| 15 → 19 | TS J  | 1 | 2.46E+06 | 3.51E+06 | 4.92E+06 | 6.78E+06 | 9.22E+06 | 1.33E+07 |
| 16 → 17 | TS 19 | 1 | 5.82E+09 | 6.32E+09 | 6.85E+09 | 7.41E+09 | 8.00E+09 | 8.76E+09 |
| 17 → 16 | TS 19 | 1 | 5.36E+08 | 6.17E+08 | 7.06E+08 | 8.06E+08 | 9.17E+08 | 1.07E+09 |
| 16 → 18 | TS I  | 1 | 2.27E+08 | 3.03E+08 | 3.99E+08 | 5.20E+08 | 6.69E+08 | 9.06E+08 |
| 16 → 23 | TS Q  | 1 | 3.30E+10 | 3.96E+10 | 4.72E+10 | 5.58E+10 | 6.57E+10 | 7.98E+10 |
